# Supplementary material for: Conclusive demonstration of iatrogenic Alzheimer’s disease transmission in a model of stem cell transplantation
Source: PubMed Central journal article supplement — Stem Cell Reports. 2024 Mar 28;19(4):456–68. doi: 10.1016/j.stemcr.2024.02.012 (PMC11096610; doi:10.1016/j.stemcr.2024.02.012), 2024-03-28
Supplement: mmc2.pdf [file mmc2.pdf]

# Conclusive demonstration of iatrogenic Alzheimer's disease transmission in a model of stem cell transplantation

Chaahat S.B. Singh,<sup>1,2,3,4,5</sup> Kelly Marie Johns,<sup>1,2,3,4,5</sup> Suresh Kari,<sup>1,2,3,4,5</sup> Lonna Munro,<sup>1,2,3,4</sup> Angela Mathews,<sup>1,2,3,4,5</sup> Franz Fenninger,<sup>1,2,3,4,6</sup> Cheryl G. Pfeifer,<sup>1,2,3,4</sup> and Wilfred A. Jefferies<sup>1,2,3,4,5,6,7,8,9,\*</sup>

<sup>1</sup>Michael Smith Laboratories, University of British Columbia, 2185 East Mall, Vancouver, BC V6T 1Z4, Canada

<sup>2</sup>The Vancouver Prostate Centre, Vancouver General Hospital, 2660 Oak Street, Vancouver, BC V6H 3Z6, Canada

<sup>3</sup>Centre for Blood Research, University of British Columbia, 2350 Health Sciences Mall, Vancouver, BC V6T 1Z4, Canada

<sup>4</sup>The Djavad Mowafaghian Centre for Brain Health, University of British Columbia, 2215 Wesbrook Mall, Vancouver, BC V6T 1Z4, Canada

<sup>5</sup>Department of Medical Genetics, University of British Columbia, 2350 Health Sciences Mall, Vancouver, BC V6T 1Z4, Canada

<sup>6</sup>Department of Microbiology and Immunology, University of British Columbia, 2350 Health Sciences Mall, Vancouver, BC V6T 1Z4, Canada

<sup>7</sup>Department of Zoology, University of British Columbia, 6270 University Boulevard, Vancouver, BC V6T 1Z4, Canada

<sup>8</sup>Department of Urologic Sciences, University of British Columbia, Level 6, 2775 Laurel Street, Vancouver, BC V5Z 1M9 Canada

<sup>9</sup>Lead contact

\*Correspondence: [wilf@msl.ubc.ca](mailto:wilf@msl.ubc.ca)

<https://doi.org/10.1016/j.stemcr.2024.02.012>

## SUMMARY

The risk of iatrogenic disease is often underestimated as a concern in contemporary medical procedures, encompassing tissue and organ transplantation, stem cell therapies, blood transfusions, and the administration of blood-derived products. In this context, despite the prevailing belief that Alzheimer's disease (AD) manifests primarily in familial and sporadic forms, our investigation reveals an unexpected transplantable variant of AD in a preclinical context, potentially indicating iatrogenic transmission in AD patients. Through adoptive transplantation of donor bone marrow stem cells carrying a mutant human amyloid precursor protein (APP) transgene into either APP-deficient knockout or normal recipient animals, we observed rapid development of AD pathological hallmarks. These pathological features were significantly accelerated and emerged within 6–9 months post transplantation and included compromised blood-brain barrier integrity, heightened cerebral vascular neoangiogenesis, elevated brain-associated  $\beta$ -amyloid levels, and cognitive impairment. Furthermore, our findings underscore the contribution of  $\beta$ -amyloid burden originating outside of the central nervous system to AD pathogenesis within the brain. We conclude that stem cell transplantation from donors harboring a pathogenic mutant allele can effectively transfer central nervous system diseases to healthy recipients, mirroring the pathogenesis observed in the donor. Consequently, our observations advocate for genomic sequencing of donor specimens prior to tissue, organ, or stem cell transplantation therapies, as well as blood transfusions and blood-derived product administration, to mitigate the risk of iatrogenic diseases.

## INTRODUCTION

The utilization of blood-derived products, blood transfusions, platelet transfusions, organ transplantation, and bone marrow transplantation, as well as emerging personalized cell and tissue-based therapies such as adoptive transfer of induced pluripotent stem (iPS) cells, represents critical clinical interventions. Nonetheless, there exist looming concerns regarding their safety. Recently, it has been proposed that Alzheimer's disease (AD) is a prion-like disease where pathology can be transmitted in a prion-like manner; for example, the transfer of a misfolded protein is enough to cause disease in the recipient. The idea that misfolded  $\beta$ -amyloid ( $A\beta$ ) peptides are proteinaceous infectious particles has previously been reported where brain extracts of AD patients were able to induce cerebral amyloidosis when transferred into mouse and primate models (Baker et al., 1993; Eisele et al., 2010; Meyer-Luehmann et al., 2006; Stohr et al., 2012). Reports of the transfer of AD pathology in humans have been associated with the use of contaminated human cadaveric pituitary-derived growth hormone (c-hGH). Pa-

tients who had received the contaminated c-hGH died of iatrogenic Creutzfeldt-Jakob disease (CJD), but, upon investigation, it was reported that these patients also had substantial immunoreactive  $A\beta$  and increased numbers of microvessels in the brain (Jaunmuktane et al., 2015a, 2015b; b), which is a pathology associated with AD, not CJD. Subsequently, some batches of c-hGH, to which CJD patients with  $A\beta$  pathology were exposed, were found to have substantial levels of  $A\beta$ 40,  $A\beta$ 42, and tau proteins (Purro et al., 2018). However, in the case of these  $A\beta$  seeding studies, the assumption is that the endogenous  $A\beta$  of the recipient contributes to the disease in a misfolded-cascading process. Regardless, the ability of transmission of disease raises concern for many of the cell-based therapies, including bone marrow transplantation or treatment with cord blood or human embryonic stem cells. Currently, many countries approve the use of bone marrow and stem cells as cancer therapies (EuroStemCell, 2020a; b; National Stem Cell Foundation of Australia and Stem Cells Australia, 2015; Ontario Institute for Regenerative Medicine, 2020; US Food & Drug Administration, 2020), and there is much research into their use for central nervous

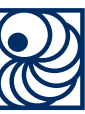

system (CNS) disorders, including AD (Zuroff et al., 2017), Parkinson's disease (Daadi et al., 2012; Kikuchi et al., 2017; Kim et al., 2002), multiple sclerosis (Freedman et al., 2010; Karussis et al., 2010), and spinal cord injury (Jin et al., 2019; Sahni and Kessler, 2010).

The traditional understanding of AD centers on the accumulation of A $\beta$  in the brain. Previously, it was thought that this A $\beta$  primarily originated from the brain itself (Goedert, 1987; Mita et al., 1989). However, recent research suggests that A $\beta$  species in the bloodstream can cross the blood-brain barrier (BBB), significantly contributing to AD pathology (Bu et al., 2018; Chen et al., 2017; Deane et al., 2003; Murphy and LeVine, 2010; Zlokovic et al., 1993, 1994). These findings, predominantly based on models with an intact amyloid precursor protein (APP) gene in the recipients, do not conclusively determine whether A $\beta$  generated within the CNS parallels the process observed in prion diseases, nor do they fully explore alternative pathways, such as those involving inflammation and inflammatory mediators, that could influence the accumulation of endogenous A $\beta$  in the CNS.

Our previous data demonstrate that A $\beta$  provides a pro-angiogenic signal for brain vasculature and that A $\beta$  may subsequently enter the brain by diffusion after the BBB is disrupted when tight junctions disappear during cell division (Biron et al., 2011, 2013; Dickstein et al., 2006; Jeffries et al., 2013; Singh et al., 2017; Ujiiie et al., 2003). The primary potential source of peripheral APP contributing to this mechanism are platelets that originate from megakaryocytes formed from hematopoietic stem cells (HSCs) (Evin et al., 2003; Li et al., 1995). Upon platelet activation,  $\beta$ -secretase enzyme activity increases in their membranes, resulting in the production of soluble A $\beta$  species (Chen et al., 1995). Although platelets originating from HSCs are the major source of peripheral A $\beta$ , other sources such as skin fibroblasts, skeletal muscles, and cerebrovascular smooth muscle cells can also produce A $\beta$  (Deane and Zlokovic, 2007).

To date, none of the preceding studies have endeavored to fulfill Koch's postulates for establishing the microbiological etiology of infection and disease. In this study, we address whether the pathological hallmarks of AD can be transferred by repopulation of the HSC compartments of wild-type or an APP-deficient knockout mouse model with donor bone marrow cells (BMCs) harboring the Swedish mutant human APP gene (APPKM670/671NL) linked to early-onset familial AD.

Other than prion diseases or transmissible spongiform encephalopathies (TSEs), this appears to be the first definitive report that cellular transplantation can adoptively transfer a disease of the CNS, and this occurrence is independent of endogenous A $\beta$ . Furthermore, to mimic the clinical setting, we also examined whether AD pathology

can be established in APP wild-type (WT) animals after the adoptive transfer of BMCs that contain the mutated, disease-causing APP gene and discovered our observations have a direct correlation to clinical scenarios where iatrogenic disease may be a risk.

This study provides new insights into the role of peripheral APP in the development of AD, challenging our existing understanding. Moreover, it underscores the sobering implications for the iatrogenic transfer of other diseases.

## RESULTS

### Successful bone marrow transfer from AD mice and WT littermates into APP-knockout recipients and from AD mice into WT recipients

To establish that transplantation of bone marrow and HSC can cause AD pathology, we (1) transferred bone marrow from AD and WT mice, both of which were positive for the lymphocyte common antigen cluster of differentiation (CD) 45.1, into APP-knockout (APP KO) mice that were positive for the lymphocyte common antigen CD45.2.; and (2) transferred BMCs from CD45.2-positive AD donors to CD45.1-positive WT mice.

After long-term repopulation (60 days), we assessed the presence of the CD45.2+ donor BMCs in APP KO mice. We found that recipient APP KO mice exhibited significant CD45.1+ donor lymphocytes. Similarly, recipient WT mice exhibited significant CD45.2 + donor lymphocytes. The representative fluorescence-activated cell sorting (FACS) graph shows (Figure 1) that the majority of the lymphocyte population was derived from the donor cells (91.6%), and only a small residual population (6.8%) of CD45.2 cells survived irradiation. Negative control for FACS analysis of successful reconstitution of donor BMC population in the recipient is illustrated in Figure S1. This was consistent across the different groups. Figure S2 shows the summary statistics of the percentage of lymphocytes from donors and recipients. The percentage of donor lymphocytes is higher than the threshold set for a successful transplant (90%), indicating a successful reconstitution of AD or WT donor BMCs in (1) irradiated APP KO recipients or Tg2576 donor BMCs and (2) irradiated WT recipients ( $p < 0.0001$ ). For both figures, freshly isolated peripheral blood mononuclear cells (PBMCs) from mice were stained with isotype-specific CD45.1 and CD45.2 antibodies and analyzed by flow cytometry. An unpaired t test was used to calculate significance.

### Behavior assessment of mice

AD $\rightarrow$ APP KO was cognitively impaired 6 months after transplantation, as compared to B6/SJL.BM $\rightarrow$ APP KO. AD $\rightarrow$ APP KO mice performed poorly in the open-field

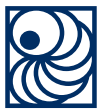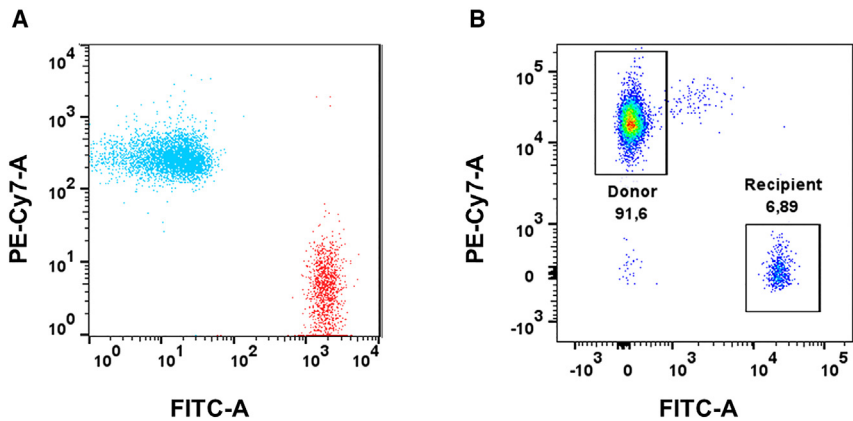

**Figure 1. Successful reconstitution of the donor BMC population in the recipient**

(A) Representative overlaid scatterplot of splenocytes from a CD45.1+ donor (blue, AD or WT) and a CD45.2+ recipient mouse (red, APP KO) before bone marrow reconstitution. (B) Representative scatterplot of PBMCs from a CD45.2+ APP KO mouse, reconstituted with CD45.1+ bone marrow from a donor mouse (AD or WT), 2 months post transplant. The recipient APP KO mouse is 91.5% CD45.1 positive, indicating successful reconstitution.

test, spending significantly more time exploring (Figure 2A,  $p = 0.0002$ ) and making more entries (Figure 2C,  $p < 0.0001$ ) in the central region of the field as compared to the WT→APP KO mice. No significant difference was seen in the distance traveled (Figure 2B) between the two groups. Figure 2D shows the track plots of animals representative of the groups. Cognitively aware mice show a high percentage of alternation (spatial awareness), as seen in WT→APP KO mice. AD→APP KO had low spatial awareness when tested on the Y maze, with a significantly lower percentage of alternation (POA) than WT→APP KO mice (Figure 2E,  $p < 0.0001$ ). The POA was not confounded by total distance traveled or the total number of arm entries (Figure S3). A significantly lower percentage of freezing in the contextual fear conditioning test indicated that the AD→APP KO had poorer associative memory than WT→APP KO mice (Figure 2F). Figures 2G and 2H show the latency time and the total number of memory errors made in the radial arm water maze (RAWM). AD→APP KO mice had diminished working and reference memories, showing no learning over the 5-day test, as compared to WT→APP KO mice. This study had data pooled from two different trials where  $n = 14$  for WT mice and  $n = 18$  for AD mice unless otherwise stated. No significant difference was observed in behavior with respect to sex. An unpaired t test was used to calculate significance.

A second study was conducted to see if a bone marrow transplant from AD mice into irradiated WT mice could establish AD pathology. A significantly high POA was observed in WT mice as compared to AD animals in the Y maze, (Figure 3A,  $p = 0.0002$ ). AD→WT mice were shown to have no significant difference in POA as compared to AD mice; however, they showed a significantly lower POA as compared to the WT mice (Figure 3A,  $p = 0.0002$ ). Data are representative of the following: AD→WT,  $n = 8$  (five males, three females); and WT,  $n = 11$  (six males, five females); and AD,  $n = 13$  (six males, seven females). An ordi-

nary one-way ANOVA with Tukey's multiple comparisons test was used to calculate statistical significance. In the RAWM (Figure 3), WT mice showed a significantly lower latency time (Figure 3B,  $p = 0.0351$ ) and number of errors (Figure 3C,  $p = 0.0114$ ) on day 5 compared to day 1. Although AD→WT animals showed a significantly lower latency time (Figure 3B,  $p = 0.0097$ ), like the AD mice, they showed no significant difference in the number of errors between test day 1 and test day 5 (Figure 3C). AD showed no difference in the latency time (Figure 3B) between day 1 and day 5. The data in Figure 3B and 3C are expressed as the mean of the latency time or the total number of errors in a single trial per day by individual animals in each group. Since the difference was being noted on day 1 versus day 5 within each group a paired t test was used to calculate significance ( $p \leq 0.05$ ).

#### AD pathology was seen through molecular and histological analysis of the mice receiving AD bone marrow transplants

Figures 4A and 4B show representative images of immunofluorescence of the pre-frontal cortex for each antibody and both animal groups, AD→APP KO and WT→APP KO mice. Human A $\beta$  can be seen in the AD→APP KO mice but not in the WT→APP KO mice. A significant increase in the neo-angiogenic vessels, shown by endoglin (CD105), can be seen in the brains of AD→APP KO mice but not in the brains of the WT→APP KO mice. A qualitative confocal image shows that CD105 and A $\beta$  colocalize with each other. The tight junction protein (TJP), occludin, is reduced in AD→APP KO brains compared to WT→APP KO, which has a continuous pattern of occludin expression resembling WT mice (Figure 4B). Western blot analysis shows that there is a presence of the A $\beta$  protein in the brain homogenates of AD→APP KO mice but no detectable A $\beta$  expression in the brains of WT→APP KO mice (Figure 4C).

To examine whether the presence of this A $\beta$  had any functional implications on the vasculature, we looked at

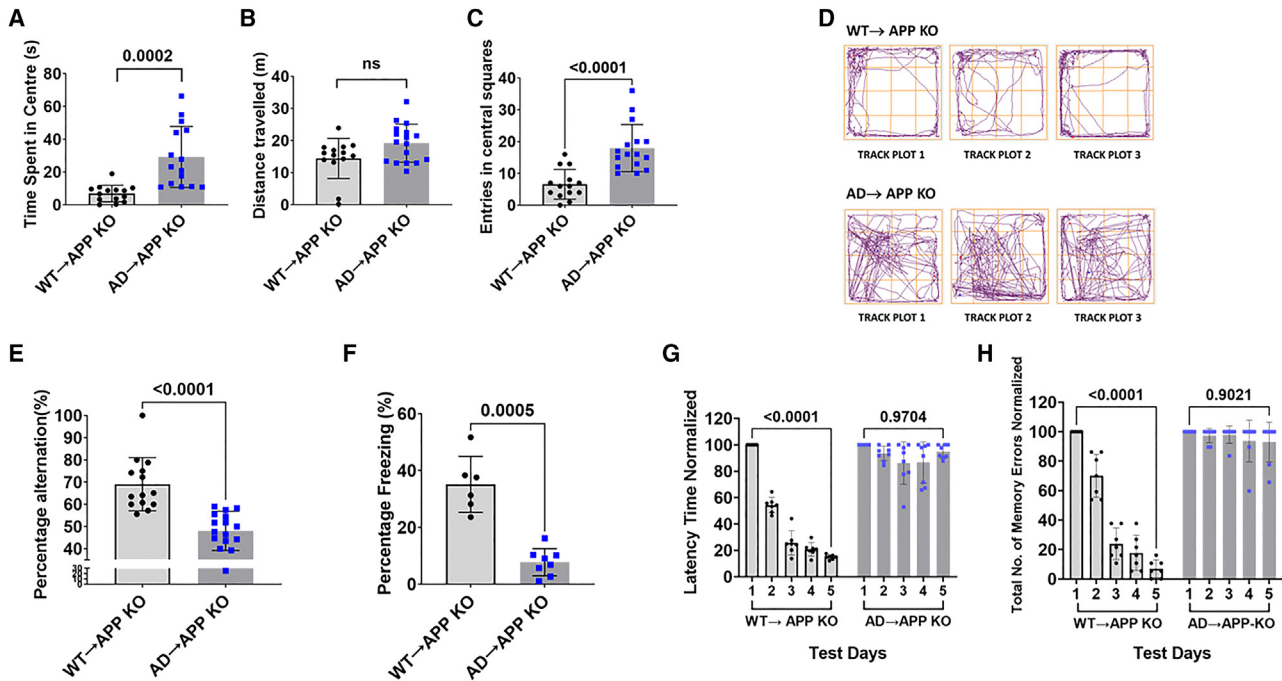

**Figure 2. Bone marrow transfer from AD mice causes cognitive deficits in APP KO recipient mice**

APP KO recipient mice with a successful reconstitution of donor BMCs were assessed for their cognitive status, using tests designed for the analysis of different aspects of memory. The data were pooled from two different trials unless stated otherwise and are represented as the mean  $\pm$  standard deviation.

(A–D) Open-field test (OFT). (A) APP KO mice that received BMCs from WT mice (WT  $\rightarrow$  APP KO) spent significantly less time in the center of the field compared to APP KO mice that received BMCs from AD mice (AD  $\rightarrow$  APP KO). (B) There was no significant difference in the distance traveled in the open field between WT  $\rightarrow$  APP KO mice and AD  $\rightarrow$  APP KO mice. (C) AD  $\rightarrow$  APP KO mice have a significantly higher number of entries in the central squares of the field than WT  $\rightarrow$  APP KO mice. (D) Representative track plots from the OFT. WT  $\rightarrow$  APP KO mice spend less time exploring the open center of the test arena while AD  $\rightarrow$  APP KO mice explore the entire field indiscriminately. Each plot in the figure represents the track from a different mouse. (A–C) An unpaired t test was used to calculate statistical significance ( $p \leq 0.05$ ). Data from two studies were pooled; AD  $\rightarrow$  APP KO,  $n = 8$  males,  $n = 10$  females; and WT  $\rightarrow$  APP KO,  $n = 7$  males,  $n = 7$  females.

(E) Spontaneous alternation (Y maze) test. A significantly high POA was observed in the WT  $\rightarrow$  APP KO mice versus the AD  $\rightarrow$  APP KO mice. An unpaired t test was used to calculate statistical significance ( $p \leq 0.05$ ). AD  $\rightarrow$  APP KO,  $n = 8$  males,  $n = 10$  females; and WT  $\rightarrow$  APP KO,  $n = 7$  males,  $n = 7$  females.

(F) Contextual fear conditioning test (FC). WT  $\rightarrow$  APP KO mice exhibited high freezing percentages compared to AD  $\rightarrow$  APP KO mice. Due to technical issues, data for this test were collected only from one trial. An unpaired t test was used to calculate statistical significance ( $p \leq 0.05$ ). Data for this test are only from the first trial due to issues with equipment at the time of the experiment. AD  $\rightarrow$  APP KO,  $n = 4$  males,  $n = 4$  females; and WT  $\rightarrow$  APP KO,  $n = 3$  males,  $n = 3$  females.

(G and H) RAWM. Both (G) latency time and (H) the total number of errors were measured. WT  $\rightarrow$  APP KO mice showed a significant decrease in the latency time and decreased number of errors when comparing results from test day 1 and test day 5. No significant differences between test day 1 and test day 5 were seen in the AD  $\rightarrow$  APP KO. A paired t test was used to calculate significance ( $p \leq 0.05$ ). AD  $\rightarrow$  APP KO,  $n = 8$  males,  $n = 10$  females; and B6/SJL.BM  $\rightarrow$  APP KO,  $n = 7$  males,  $n = 7$  females.

the expression of vascular endothelial growth factor a (VEGFa), a factor that is crucial for angiogenesis initiation, and, to assess the effect of A $\beta$  transferred via HSC transplant on the BBB integrity of the recipient, the TJP, zona occludens 1 (ZO1) expression levels were analyzed (Figure 4C). The western blot analysis showed higher expression of the VEGFa and lower expression of ZO1 in the brain homogenates of the AD  $\rightarrow$  APP KO bone marrow compared to the WT  $\rightarrow$  APP KO mice (Figure 4C). This implies not

only that there is a transfer A $\beta$  to the recipient mouse brain but also that this A $\beta$  can induce AD pathology in mice that have no endogenous APP expression in their brains or indeed any other organ.

To assess the effect of a bone marrow transplant from AD mice into WT mice as a direct translation for a clinical setting, we looked at the establishment of amyloid plaques generated by the mutant human APP gene. Figure 5 shows micrographs that are representative of the cortical region of mouse brains.



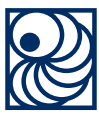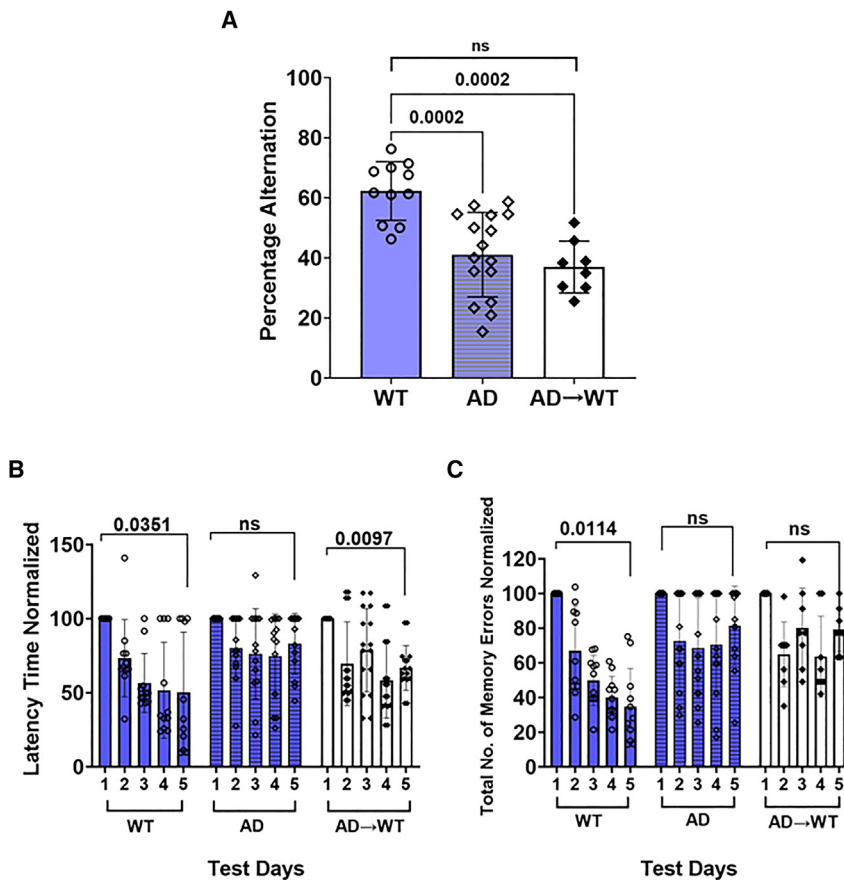

**Figure 3. Bone marrow transfer from AD mice causes cognitive deficits in certain aspects of memory in WT recipient mice**

(A) Y maze. A significantly high POA was observed in WT mice as compared to AD animals. AD→WT mice were tested and shown to have no significant difference in percentage alternation as compared to AD mice; however, they showed a significantly lower POA as compared to the WT mice. Data is shown as the mean  $\pm$  SD and is representative of AD→WT,  $n = 8$  (five males, three females) and WT;  $n = 11$  (six males, five females); and AD,  $n = 13$  (6 males, 7 females). An ordinary one-way ANOVA with Tukey's multiple comparisons test was used to calculate statistical significance ( $p \leq 0.05$ ). (B and C) RAWM. Both: (B) latency time and (C) the total number of errors were measured. B6/SJL control mice showed a significantly lower latency time and number of errors on day 5 compared to day 1. Although AD→WT animals showed a significantly lower latency time, like the AD mice, they showed no significant difference in the number of errors between test day 1 and test day 5. AD mice showed no difference in the latency time between day 1 and day 5. The data in (B) and (C) are expressed as the mean of the latency time or the total number of errors in a single

trial per day by individual animals in each group. Since the difference was being noted on day 1 versus day 5 within each group, a paired  $t$  test was used to calculate significance ( $p \leq 0.05$ ).

Congo red staining showed that Tg2576 mice had significantly higher plaques than the WT mice ( $p = 0.0002$ ). The Congo red staining also showed the establishment of amyloid plaques in AD→WT mice, which were significantly higher as compared to the WT animals ( $p = 0.0105$ ) and similar to the levels seen in AD mice. An ordinary one-way ANOVA was used to calculate significance ( $p \leq 0.05$ ).

## DISCUSSION

This study challenges the prevailing understanding that AD is exclusively familial or sporadic. Using a preclinical model, we demonstrate a transplantable form of AD, suggesting potential iatrogenic transmission in AD patients. Here we specifically address the potential of bone marrow stem cell transplants in the transmission of AD in a familial model of this deadly disease. We found that transferring bone marrow from AD mice into APP KO mice resulted in cognitive impairment as well as  $A\beta$  extracellular deposits and BBB dysfunction. In particular, we demonstrated that AD→APP KO chimeric mice accumulate the human  $A\beta$  in the brain originating exclusively from the donor show increased expression

of the neoangiogenic marker CD105, and show a decreased expression of the TJPs occludin and ZO1. Our data demonstrate that transplantation of bone marrow, containing HSCs, from a donor mouse that overproduces a mutant human APP, can transfer AD pathology in a recipient animal that does not synthesize endogenous APP. Furthermore, the rate of disease formation in the transplantable model is much more rapid than in the AD mice as it is established in the AD bone marrow recipients in 6 months compared to 12 months in the AD transgenic mice (Biron et al., 2011, 2013; Dickstein et al., 2006; Hsiao et al., 1996; Jefferies et al., 2013; Singh et al., 2021; Ujiiie et al., 2003).

There is indeed evidence that transplant recipients, including those of solid organs and HSCs, have a higher incidence of various neurological diseases. For solid organ transplant recipients, CNS complications are relatively common and include both focal and diffused neurologic deficits. These complications can be due to a range of causes, including infections, drug toxicity, cerebrovascular events, metabolic disorders, and cancer. Notably, the incidence of neurological complications in kidney transplant recipients is reported to be around 10%–21%, which is higher than in the general population. Factors contributing

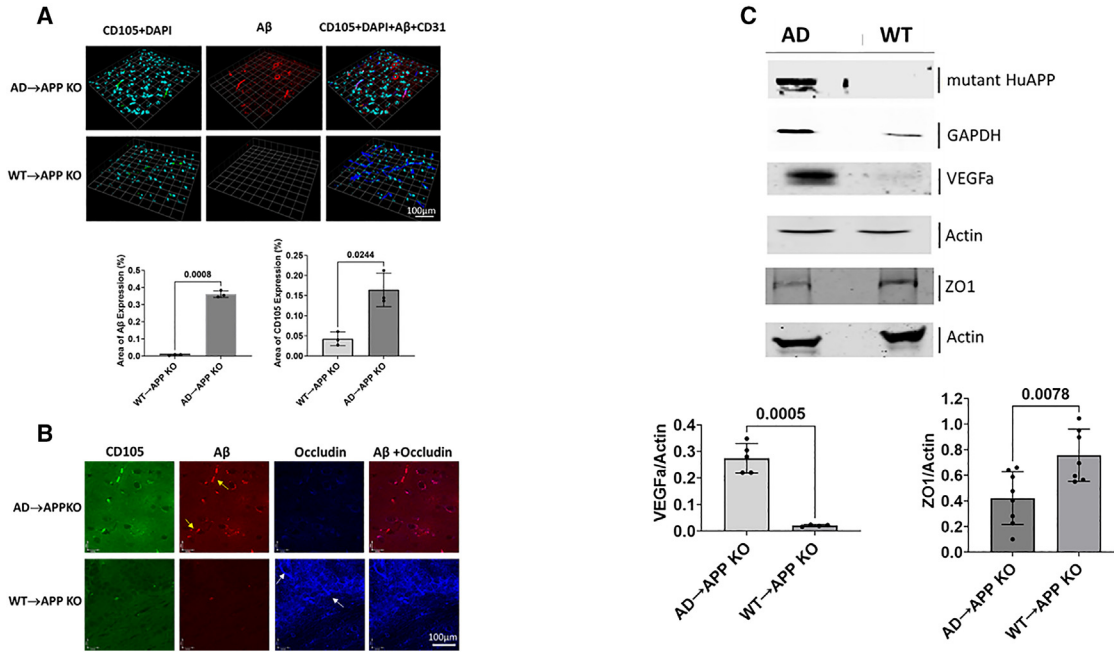

**Figure 4. AD pathology is seen in the brains of APP KO mice reconstituted with AD bone marrow**

(A) Micrographs show the immunostaining and confocal imaging of the cortical region of WT → APP KO and AD → APP KO mouse brains. The expression levels of CD105 (green), DAPI (cyan), A $\beta$  (red), and CD31 (blue) are shown where A $\beta$  and CD105 are significantly higher in AD → APP KO mice compared to WT → APP KO mice. Data are shown as mean  $\pm$  SD of percentage area of expression. Unpaired Student's t test was used to calculate significance ( $p \leq 0.05$ ).

(B) Qualitative IHC shows the expression of CD105 (green), A $\beta$  (red), and occludin (blue). The occludin expression is inverse to that of CD105 and A $\beta$ , and A $\beta$  is seen co-localizing with CD105.

(C) Qualitative western blotting analysis indicates the presence of mutant human APP protein in AD → APP KO animals and an absence of it in the WT → APP KO. VEGFa is expressed higher in AD → APP KO ( $n = 5$ ) compared to WT → APP KO ( $n = 4$ ). Expression levels of TJP, ZO1, are higher in WT → APP KO ( $n = 7$ ) compared to AD → APP KO ( $n = 8$ ). Blots shown here are from pooled samples from the animals in the groups to be representative of the group. Histograms show expression levels of proteins in individual animals. Unpaired Student's t test was used to calculate significance ( $p \leq 0.05$ ).

to these complications include the need for multiple drugs, decreased cellular immunity, accelerated atherosclerotic disease, and frequent metabolic abnormalities (Meena et al., 2020; Potluri et al., 2014; van den Bogaart et al., 2022; Wright and Fishman, 2014).

In the specific context of hematopoietic stem cell transplantation (HSCT) for pediatric acute lymphoblastic leukemia, neurological complications, both acute and long term, are also common and contribute to significant morbidity and mortality. The incidence of neurotoxicity in children following HSCT ranges from 11% to 59%. A *post mortem* study of 180 HSCT recipients, including both adults and children, found that 90% had evidence of CNS abnormality, and, in 17% of cases, this was the cause of death. Furthermore, outcomes of HSCT are poorer for patients who develop acute neurotoxicity. The majority of studies on the neurological effects of HSCT in children have focused on acute neurotoxicity, but, as more children undergoing HSCT for acute lymphoblastic leukemia become long-term survivors, under-

standing the long-term neurological consequences of this treatment modality is increasingly important. Radiotherapy and chemotherapy, as parts of HSCT treatment, can add to neurological injury and have profound effects on brain maturation and cognitive function (Gabriel et al., 2021).

The APP KO mice do not produce endogenous A $\beta$  in any tissue or organ. If current theories relating to the causation of AD were correct, for example, that brain-derived A $\beta$  causes AD pathology, then the reconstitution of the APP KO mice with AD HSCs should not have induced AD pathology. The findings in this study establish that HSC-derived A $\beta$  can initiate vascular pathology leading to BBB disruption and eventual AD pathology and the findings in this study establish that peripherally derived A $\beta$  can initiate vascular pathology and BBB disruption.

The Swedish mutation version of the human amyloid precursor transgene expression is driven by the prion promoter that drives expression in a variety of tissues, including blood cells, and we assume this is the source of the APP originating

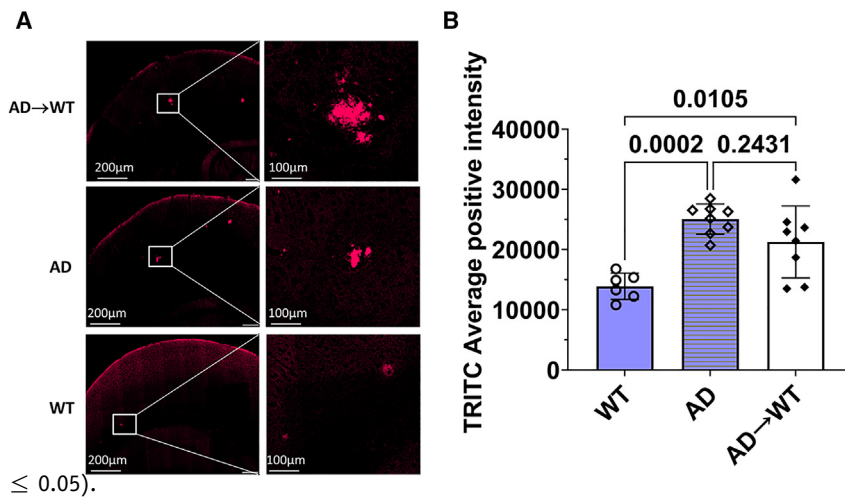

**Figure 5. Presence of amyloid plaques in AD→WT mice suggests establishment of AD pathology in WT mice through a bone marrow transplant**

(A) Micrographs are representative of the cortical region of mouse brains.

(B) Congo red staining indicates the establishment of amyloid plaques in AD→WT mice, which is seen to be significantly higher as compared to WT and similar to the levels seen in AD animals. Each data point in the histograms corresponds to data from individual mice in each group, where  $n = 6$  for WT,  $n = 8$  for AD, and  $n = 8$  for AD→WT. Data is represented as mean  $\pm$  SD. Ordinary one-way ANOVA was used to calculate significance ( $p \leq 0.05$ ).

from the donor HPC cell (PRNP Gene - Prion Protein and Gene Cards, 2023; Asante et al., 2002a, 2002b; Levine et al., 2009). A significant amount of the peripheral A $\beta$  is found in circulating platelets (Chen et al., 1995; Matsubara et al., 2002) that originate from megakaryocytes. In the AD mice (Tg2576), bone marrow and HSCs carrying the human mutant APP are known to overproduce A $\beta$  in megakaryocytes (Starke et al., 2005). A $\beta$  generated from activated platelets is known to exist in a soluble form (Chen et al., 1995; Matsubara et al., 2002) and this property may enable them to be transported from another location in the body into the CNS through the cerebral vessels. Another way for the soluble A $\beta$  to enter the CNS is via the platelets circulating in the cerebral vessels (Inyushin et al., 2017; Kucheryavykh et al., 2017). Tight junctions, which are present in the endothelial layer of the cerebral vessels, have high amounts of collagen, a platelet activator, in their vicinity, especially the basement membrane of cerebral vessels (Xu et al., 2019). This collagen may lead to the activation of the platelets and release of the A $\beta$  into the cerebral vessels. The released A $\beta$  activates cell division and vasculogenesis leading to the breakdown in BBB integrity, allowing A $\beta$  to freely cross the BBB and enter the CNS by diffusion where it deposits in amyloid plaques (Biron et al., 2011, 2013; Dickstein et al., 2006; Jefferies et al., 2013; Singh et al., 2017; Ujiie et al., 2003). The receptor for advanced glycation products (RAGE) is a multi-ligand receptor that also regulates the entry of peripheral A $\beta$  to the brain. It binds soluble A $\beta$  in the nanomolar range, and its expression is upregulated by the presence of A $\beta$  and is also implicated in BBB breakdown and AD pathogenesis (Deane et al., 2003; Yan et al., 1996). Another possibility of transfer of A $\beta$  into the CNS could be as a result of the physiological age-related disruption of the BBB. This breakdown could permit the transfer of the soluble A $\beta$  into the brain (Montagne et al., 2015). Once AD pathology initiates, it can trigger further vasculogenesis and breakdown of the

BBB. However, several other types of blood cells also express APP in the Tg2576 mouse; therefore, future studies are needed in order to address this.

One of the potential outcomes of this study is to spur the field to move away from the conventional central dogma of AD pathology, which states that the accumulation of brain-derived A $\beta$ , specifically produced by neurons, is the cause of the disease. This study demonstrates the contribution of A $\beta$ , generated outside the brain, in establishing the disease. This may provide an opportunity for the development of new biomarkers for AD. The production of AD pathology in AD→APP KO mice also supports the concept that AD can be transferred from individual to individual, resulting in the discovery of a transplantable form of AD that is distinct from the sporadic or familial forms of the disease. This suggests the importance of biomarker screening and sequencing the genomes of candidate cell, tissue, and organ donors for deleterious disease-associated alleles to eliminate the potential for the transfer of disease before utilizing them as donors for any transplantation therapies including tissue and organ transplantation as well as bone marrow transplants, blood transfusion, or stem cell-based therapies.

However, it is important to acknowledge the limitations of this work. While the results from the study using the Tg2576 AD model and APP KO mice provide valuable insights, caution must be exercised when translating these findings to human stem cell transplant recipients. The Tg2576 model, with mutant APP expression under the control of the hamster prion protein promoter, generates a high level of pathology not typically observed in human familial AD patients. The use of a heterologous promoter and recipients completely deficient in APP, a condition rare in humans, adds further methodological layers that may not directly reflect conditions in humans, though it does establish, for the first time, that exclusively donor derived

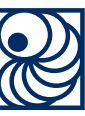

mutant APP is necessary and sufficient to cause disease in recipients.

Given these differences, the study's findings may not directly correspond to the clinical experience of stem cell transplantation and its potential neurological implications. The adoption of a murine model may not fully capture the complexity of AD in humans, and variations in the immune response and genetic factors between species should be acknowledged. Furthermore, the observed pathological features, while resembling AD, may not precisely replicate the multifaceted nature of the disease in humans. Notably, the form of AD studied here is familial, which may limit the transferability of results to humans, as familial forms are rarer than sporadic ones. However, the additional observation in this study demonstrating the transfer of the AD phenotype from Tg2576 AD model bone marrow donors into healthy WT recipients lessens the chance that our data will not find its human sequelae.

It is also important to recognize the broader context of transplant-related neurological complications. As shown by the higher incidence of neurological diseases in transplant recipients, both in solid organ and hematopoietic stem cell transplant settings, there is a clear indication that transplant procedures can lead to significant CNS complications. These include a wide array of issues stemming from infections, drug toxicities, metabolic abnormalities, vascular and immunologic events, and the primary disease itself. Thus, while the specific findings of the study might not directly translate to human cases, they do contribute to a growing body of knowledge about the potential neurological risks associated with various types of transplantation. This information is crucial for the development of strategies to mitigate these risks and improve patient outcomes in both pediatric and adult populations.

In conclusion, the underestimation of iatrogenic disease risk in contemporary medical practices, including tissue and organ transplantation, stem cell therapies, blood transfusions, and blood-derived product administration, has begun to be addressed here. Contrary to prevailing beliefs regarding AD occurring solely in familial or sporadic forms, our study reveals an unexpected transplantable form of AD in a preclinical model, suggesting potential iatrogenic transmission in AD patients. Adoptive transplantation of donor BMCs harboring a mutant human APP transgene into both APP-deficient and healthy WT recipient animals resulted in the rapid development of AD pathological hallmarks. These included compromised BBB integrity, increased cerebral vascular neoangiogenesis, elevated brain-associated A $\beta$  levels, and cognitive impairment that is accelerated and occurs within 6–9 months post transplantation. Moreover, our findings suggest that A $\beta$  accumulation originating externally to the CNS contributes to AD pathology.

While the study provides valuable insights, further research involving human subjects is essential to validate the applicability of these findings to clinical settings. However, given the findings of this study, the proposed recommendation for genomic screening of donor specimens before transplantation therapies or the transfer of blood-derived products necessitates careful deliberation.

## EXPERIMENTAL PROCEDURES

### Resource availability

#### Lead contact

Further information and requests for resources and reagents should be directed to and will be fulfilled by the lead contact, Dr. Wilfred A. Jefferies.

#### Materials availability

This study did not generate new unique reagents.

#### Data and code availability

Data and code availability can be provided upon request.

### Mice

Key animal nomenclature:

AD mice or Tg2576: transgenic mice, heterozygous for the mutant human APP gene.

WT: WT littermates of Tg2576 mice, homozygous for the normal endogenous APP gene.

APP KO: mice homozygous for the APP gene being knocked out.

AD $\rightarrow$ APP KO: irradiated APP KO mice that have been reconstituted with BMCs from AD mice.

WT $\rightarrow$ APP KO: irradiated APP KO mice that have been reconstituted with BMCs from WT mice.

AD $\rightarrow$ WT: irradiated WT mice that have been reconstituted with BMCs from AD mice.

The Tg2576 AD model mouse expresses the K670N/M671L Swedish mutation of the APP (Hsiao et al., 1995, 1996) under the control of the hamster prion protein promoter. Tg2576 mice are always heterozygous for the transgene as the homozygous offspring is not viable. These are on a B6.SJL background where B6 represents the C57BL/6 mice and the SJL is Swiss Jim Lambert mice, and the colony at the University of British Columbia is occasionally refreshed with B6.SJL mice purchased from Taconic Biosciences (B6.SJL-*Ptprc<sup>d</sup>/BoyAiTac*; catalog #4007-F). Homozygous APP KO (APP KO) mice (B6.129S7-*Apptm1Dbo/f*; catalog #004133, Jackson Labs, USA) on a C57BL/6 background (Zheng et al., 1995) were fed standard lab chow and water *ad libitum* and kept under a 12-h light/dark cycle. All protocols and procedures involving the care and use of animals in these studies were reviewed and approved by the UBC Animal Care Committee under the guidelines of the Canadian Council of Animal Care.

### Flow cytometric analysis of lymphocytes

CD45 is a type 1 transmembrane protein that is present on all differentiated hematopoietic cells and is a useful marker for determining bone marrow transplant efficiency (Omilusik et al., 2011). C57BL/6 mice are genetically CD45.2, whereas SJL mice are





CD45.1, so all AD and WT littermates were tested for CD45 alleles and only those that were CD45.1 were used as donors; all APP KO recipients were CD45.2 (on C57Bl/6 background). Briefly, 50–100  $\mu$ L of blood was collected into EDTA-coated tubes and lymphocytes were isolated after red blood cell (RBC) lysis. Isolated lymphocytes were then incubated with antibodies against CD45.2 (FITC anti-mouse CD45.2 antibody; BioLegend; 109805) and CD45.1(PE/Cy7 anti-mouse CD45.1 Antibody (Biolegend; 110729) in FACS buffer (phosphate-buffered saline [PBS], 0.5%–1% BSA or 5%–10% FBS). The samples were analyzed for CD45 type using a BD LSRII (BD Biosciences). Lymphocytes were gated based on size and shape, and gating was consistent among all samples. The representative graph was normalized to mode, which allows the visualization of the relative percentage of a cell population expressing the marker fluorescence and compensates for the visual difference in cell count. FlowJo software (Treestar) was used to analyze flow cytometry data.

### Bone marrow transfer: Experimental setup

Two transplant studies were conducted:

- (1) AD mice and their WT littermates were used as donors to transplant bone marrow into APP KO mice. Twelve-month-old AD and WT of both sexes were used as donors.
- (2) The second study consisted of the bone marrow transfer of AD mice into WT animals. Twelve-month-old AD mice of both sexes were used as donors.

For the collection of BMCs from donor mice, the proximal ends of the tibia and femur were cut off and placed in a 0.5-mL microfuge tube with the bottom cut off, and this setup was placed inside a 2-mL centrifuge tube. The tubes were centrifuged at 2000 rpm for 5 s. The bone marrow pellet was resuspended in culture medium and treated with RBC lysis buffer (10 $\times$  buffer: NH<sub>4</sub>Cl [ammonium chloride] 8.02 g, NaHCO<sub>3</sub> [sodium bicarbonate] 0.84 g, EDTA [disodium] 0.37 g, quantum satis to 100 mL with Millipore water). The working solution of the lysis buffer was used at 1 $\times$ . The cells were then centrifuged and resuspended in PBS and cells were counted with the Bio-Rad TC20 automated cell counter.

For the first study, 6- to 8-week-old APP KO recipient mice of both sexes were X-irradiated at 900 Rads. Then 2  $\times$  10<sup>6</sup> donor BMCs were injected via the tail vein into each recipient mouse on the same day. One donor mouse per sex and genotype was used per two sex-matched recipient mice. APP KO mice (n = 5 female and n = 5 male) received BMCs from n = 3 AD mice of each sex. APP KO mice (n = 4 male and n = 4 female) received BMCs from n = 2 WT mice of each sex. This transplant experiment was repeated with the same conditions and number of mice of both sexes for both recipient and donors. It was observed that two mice from both the groups (i.e., those that received AD and WT BMCs) in one of the trials either died randomly or had to be euthanized after reaching the humane endpoint. This occurred immediately after the transplant, which could indicate procedural issues in those animals. No relation to sex was observed. N is indicated in the figure legend of each experiment.

Two months post injections, the mice were assessed for a successful bone marrow reconstitution by FACS analysis of lymphocyte populations. The donors used were positive for CD45.1, whereas

the recipients were CD45.2 positive. After reconstitution, the recipients were checked to see the percentage of lymphocytes that were CD45.1 positive. A reconstitution was considered successful if 90% or more of the cells in the recipient were CD45.1 positive.

For the second study, 6- to 8-week-old WT mice underwent a similar irradiation protocol as stated in the first study. n = 3 female and n = 7 male WT mice received BMCs from sex-matched AD. Similar to the first study, the successful bone marrow reconstitution was established by FACS analysis of lymphocyte populations 2 months post transplant. The donor mice were either CD45.2 positive or double-positive for CD45.1 and CD45.2.

### Behavioral testing

#### Open-field test

The mice were allowed to explore a plexiglass chamber with dark-colored walls and a light source focused in the center one at a time for 5 min. The path traveled and the time spent in the center or periphery of the field were tracked and recorded (Singh et al., 2021). The setup for the test is described in the [supplemental experimental procedures](#).

#### Spontaneous alternation (Y maze)

The test for novelty exploration using spatial and working memory was conducted where the spatial acquisition phase comprised a 1-day trial with the mice tracked while moving freely through the three arms of the Y maze during an 8-min session. The movements were tracked by a computer tracking system (ANY-maze, Stoelting). The performance was gauged by the POAs, which was calculated as the total number of alternations  $\times$  100/(total number of arm entries – 2) (Singh et al., 2021). The minimum number of arm entries needed for a mouse to be included in the analysis was five entries (International Mouse Phenotyping Consortium). The setup for the test is described in the [supplemental experimental procedures](#).

#### Contextual fear conditioning

Contextual fear conditioning was used to determine associative working memory. One at a time, the animals were kept in a chamber with a steel-grid floor with a shock generator. On day 1, they were allowed to explore freely for 5 min, during which, at the 180th second, they received a foot shock of 0.50–0.80 mA for 3 s. On day 2, they were placed in the chamber for 4 min, with no noxious stimuli. The mice were monitored for movement and freezing behavior was recorded using computer software (Lime-light, ActiMetrics, Wilmette, IL, USA) (Singh et al., 2021). The setup for the test is described in the [supplemental experimental procedures](#).

#### RAWM

The RAWM consists of eight swim paths (arms) extending out of an open central area, with an escape platform located at the end of any of four alternate arms called the goal arms (Penley et al., 2013). The mice were given 60 s to locate one of the four escape platforms. With each trial, the platform that was used to escape was removed. These trials were conducted over 5 days. The latency to reach the platform for each trial and the arm entries were recorded manually. Performance of memory and learning was



gauged each day based on the latency time and the total number of errors (Singh et al., 2021). The setup for the test is described in the supplemental experimental procedures.

### Tissue preparation

After the behavior studies, the animals were terminally anesthetized with ketamine/xylazine (150 mg/kg; 10 mg/kg) and perfused with PBS for 5 min at a 5 mL/min flow rate. Brains were removed, and one hemisphere was fixed with 4% paraformaldehyde (PFA) for histology and stored at 4°C and the other hemisphere was flash-frozen on dry ice for biochemical studies and stored at -80°C until they were ready to be analyzed. Flash-frozen mouse brain hemispheres were homogenized mechanically using a Dounce homogenizer (Wheaton, 7-mL Tissue Grinder, Dounce) in 1× PBS solution containing 1× Halt protease and phosphatase inhibitor cocktail (Thermo Fisher Scientific; 78440) to prevent protein degradation, and then centrifuged at 14,000 rpm for 10 min to separate the tissue into a soluble fraction, containing cytosolic proteins, and a pellet. The pellet was resuspended in 2% sodium dodecyl sulfate (SDS) solution in distilled H<sub>2</sub>O and then centrifuged at maximum speed for 30 min. The supernatant from this treatment contained membrane-bound proteins.

### Immunoblotting analysis

For western blot analysis, the fractional homogenate samples (cytosolic and membrane bound) were prepared in the sample buffer (100 mM Tris-Cl [pH 6.8], 4% [w/v] SDS, 0.2% [w/v] bromophenol blue, 20% [v/v] glycerol, and 200 mM dithiothreitol [DTT]). Samples were then electrophoresed on 10% SDS-PAGE gels and the proteins were transferred to a nitrocellulose membrane. Immunoblotting was performed using primary antibodies against CD105/endoglin (0.25 µg/mL, R&D systems; AF1097), Aβ (1:1,000, 6E-10; BioLegend 39320), anti-ZO1 (2 µg/mL, Thermo Fisher Scientific; 61-7300), anti-GAPDH antibody (1:100, Abcam; ab181602), anti-actin (1:1000, Santa Cruz; sc1615 and anti-VEGFa (1 µg/mL, Abcam; ab46154). After the overnight incubating with primary antibodies at 4°C, the membranes were washed three times with 1× PBS solution for 15 min each and then incubated with the secondary antibodies (1:10,000) for 1 h at room temperature followed by washing three times with 1× PBS. The signal intensities on the membrane were imaged using the Odyssey infrared image system (LICOR), and relative levels of immunoreactivity were analyzed by the Image Studio Lite Software. The blots shown are representative of n = 6 per group.

### Immunofluorescence and confocal imaging

The PFA fixed hemispheres were processed for immunofluorescent microscopy for various proteins of interest: CD105 (R&D Systems; 15 µg/mL, AF1097); Aβ<sub>1-16</sub> (1 µg/mL, BioLegend; 803004); TJP, occludin (1:200, Abcam; ab31721); and CD-31 (1:50, Abcam; ab28364) as described in Singh et al., 2021.

The cortical region of the mouse brain was analyzed for markers of interest involved in AD pathology. The image acquisition was done using the Olympus FV-10i confocal microscope with a high-resolution Olympus 60×/1.4 oil-immersion objective lens (Olympus, Tokyo, Japan). For 3D image dataset acquisition, the excitation beam was first focused at the maximum signal intensity

focal position within the brain tissue sample and the appropriate exposure times were selected to avoid pixel saturation. A series of 2D images (z stack) were taken at a step size of 1 µm. The beginning and end of the 3D stack were set based on the signal level degradation. The series of images taken were saved in the Olympus software. The Volocity software (PerkinElmer) was then used to process the series of images that were taken and generate a 3D reconstruction of the tissue.

### Congo red staining

In addition, immunofluorescence analysis was carried out for the AD, WT and AD → WT mice, where the PFA-fixed mouse hemibrains were embedded in paraffin, cut into 4-µm sections, and collected onto charged slides. For the Congo red staining, the brain sections were immersed in 2.5% NaCl in 80% ethanol, followed by incubation in 0.2% Congo red for 20 min, and slides were mounted with a Fluoromount and were scanned in the fluorescent module using a Tetramethylrhodamine (TRITC) filter at 20× in an Olympus VS-120 slide scanner (Evident, Tokyo, Japan). One section of 4-µm thickness was stained with Congo red for each animal. Image acquisition of the entire area of the 4-µm-thick hemibrain section was done and measurement of the Congo red-stained areas was performed using the Area Quantification FL V2.3.4 module from HALO Image Analysis Platform V3.6.4134 (Indica Labs, USA). Each data point in the histograms corresponds to data from individual mice in each group where n = 6 for WT, n = 8 for AD, and n = 8 for AD → WT.

### Statistical analysis

The data are presented as the mean ± standard deviation. The statistical analyses were done with the help of the GraphPad Prism software using the unpaired or paired Student's t test when comparing two groups, which is specified in the figure legends, and a two-way ANOVA test for multiple comparisons with a Bonferroni test to correct for the multiple comparisons. The sample size for each experiment is indicated in the figure legend.

### SUPPLEMENTAL INFORMATION

Supplemental information can be found online at <https://doi.org/10.1016/j.stemcr.2024.02.012>.

### ACKNOWLEDGMENTS

We thank Drs. Dara Dickstein and Hitesh Arora for their helpful discussions and comments on the manuscript; and Dr. Hitesh Arora, Sarah Dada, Wing Yan Leung, Wenjing Xia, Dr. Eliana Al Haddad, Dr. Giorgia Caspani, Dr. Jay Young, and Emmanuel Garrovillas for technical assistance. We recognize the following funding sources for their financial assistance with this study: W.A.J. was funded by the Canadian Institutes of Health Research (CIHR) operating grant (MOP-133635) and a grant from the W. Garfield Weston Foundation/Weston Brain Institute (RR161038); C.S.B.S. was supported by a Centre for Blood Research (UBC) Graduate Student Award; F.F. was the recipient of a DOC Fellowship of the Austrian Academy of Science and the Dmitry Apel Memorial Scholarship; and donations to the laboratory of W.A.J. through the Sullivan



Urology Foundation at Vancouver General Hospital (<https://www.urologyfoundation.ca>).

The authors wish to acknowledge the contribution of Vivian Bradaschia and Kyle Roberton in the Pathology Core at The Center for Phenogenomics (Toronto, Canada) for the Congo red staining, digital pathology, and image analysis.

## AUTHOR CONTRIBUTIONS

W.A.J conceived the study. C.S.B.S., L.M., C.G.P., and W.A.J. designed research. C.S.B.S., K.M.J., L.M., and F.F. performed research. C.S.B.S., F.F., S.K., A.M., and W.A.J. analyzed data. C.S.B.S. and W.A.J. wrote the paper. C.S.B.S., C.G.P., and W.A.J. edited the paper.

## DECLARATION OF INTERESTS

Authors hold equity in the start-up company, Cava Healthcare, which possesses intellectual property related to these findings. This had no role in the study design, data collection, analysis or interpretation of data, or in the writing of the paper.

Received: July 23, 2020

Revised: February 27, 2024

Accepted: February 28, 2024

Published: March 28, 2024

## REFERENCES

PRNP Gene - Prion Protein (2023). In GeneCards the Human Gene Database, GeneCards, ed..

Asante, E.A., Gowland, I., Linehan, J.M., Mahal, S.P., and Collinge, J. (2002a). Expression Pattern of a Mini Human PrP Gene Promoter in Transgenic Mice. *Neurobiol. Dis.* *10*, 1–7.

Asante, E.A., Linehan, J.M., Desbruslais, M., Joiner, S., Gowland, I., Wood, A.L., Welch, J., Hill, A.F., Lloyd, S.E., Wadsworth, J.D.F., and Collinge, J. (2002b). BSE prions propagate as either variant CJD-like or sporadic CJD-like prion strains in transgenic mice expressing human prion protein. *EMBO J.* *21*, 6358–6366.

Baker, H.F., Ridley, R.M., Duchen, L.W., Crow, T.J., and Bruton, C.J. (1993). Evidence for the experimental transmission of cerebral beta-amyloidosis to primates. *Int. J. Exp. Pathol.* *74*, 441–454.

Biron, K.E., Dickstein, D.L., Gopaul, R., Fenninger, F., and Jefferies, W.A. (2013). Cessation of neoangiogenesis in Alzheimer's disease follows amyloid-beta immunization. *Sci. Rep.* *3*, 1354.

Biron, K.E., Dickstein, D.L., Gopaul, R., and Jefferies, W.A. (2011). Amyloid triggers extensive cerebral angiogenesis causing blood brain barrier permeability and hypervascularity in Alzheimer's disease. *PLoS One* *6*, e23789.

Bu, X.L., Xiang, Y., Jin, W.S., Wang, J., Shen, L.L., Huang, Z.L., Zhang, K., Liu, Y.H., Zeng, F., Liu, J.H., et al. (2018). Blood-derived amyloid-beta protein induces Alzheimer's disease pathologies. *Mol. Psychiatr.* *23*, 1948–1956.

Chen, G.F., Xu, T.H., Yan, Y., Zhou, Y.R., Jiang, Y., Melcher, K., and Xu, H.E. (2017). Amyloid beta: structure, biology and structure-based therapeutic development. *Acta Pharmacol. Sin.* *38*, 1205–1235.

Chen, M., Inestrosa, N.C., Ross, G.S., and Fernandez, H.L. (1995). Platelets are the primary source of amyloid beta-peptide in human blood. *Biochem. Biophys. Res. Commun.* *213*, 96–103.

Daadi, M.M., Grueter, B.A., Malenka, R.C., Redmond, D.E., Jr., and Steinberg, G.K. (2012). Dopaminergic neurons from midbrain-specified human embryonic stem cell-derived neural stem cells engrafted in a monkey model of Parkinson's disease. *PLoS One* *7*, e41120.

Deane, R., Du Yan, S., Subramanian, R.K., LaRue, B., Jovanovic, S., Hogg, E., Welch, D., Manness, L., Lin, C., Yu, J., et al. (2003). RAGE mediates amyloid-beta peptide transport across the blood-brain barrier and accumulation in brain. *Nat. Med.* *9*, 907–913.

Deane, R., and Zlokovic, B.V. (2007). Role of the blood-brain barrier in the pathogenesis of Alzheimer's disease. *Curr. Alzheimer Res.* *4*, 191–197.

Dickstein, D.L., Biron, K.E., Ujiie, M., Pfeifer, C.G., Jeffries, A.R., and Jefferies, W.A. (2006). A[beta] peptide immunization restores blood-brain barrier integrity in Alzheimer disease. *FASEB J.* *20*, 426–433.

Eisele, Y.S., Obermüller, U., Heilbronner, G., Baumann, F., Kaeser, S.A., Wolburg, H., Walker, L.C., Staufienbiel, M., Heikenwalder, M., and Jucker, M. (2010). Peripherally applied Abeta-containing inoculates induce cerebral beta-amyloidosis. *Science* *330*, 980–982.

EuroStemCell (2020a). Cord Blood Stem Cells: Current Uses and Future Challenges.

EuroStemCell (2020b). Medicine and Stem Cells.

Evin, G., Zhu, A., Holsinger, R.M.D., Masters, C.L., and Li, Q.X. (2003). Proteolytic processing of the Alzheimer's disease amyloid precursor protein in brain and platelets. *J. Neurosci. Res.* *74*, 386–392.

Freedman, M.S., Bar-Or, A., Atkins, H.L., Karussis, D., Frassoni, F., Lazarus, H., Scolding, N., Slavin, S., Le Blanc, K., and Uccelli, A.; MSCT Study Group (2010). The therapeutic potential of mesenchymal stem cell transplantation as a treatment for multiple sclerosis: consensus report of the International MSCT Study Group. *Mult. Scler.* *16*, 503–510.

Gabriel, M., Hoeben, B.A.W., Uhlving, H.H., Zajac-Spychala, O., Lawitschka, A., Bresters, D., and Ifversen, M. (2021). A Review of Acute and Long-Term Neurological Complications Following Haematopoietic Stem Cell Transplant for Paediatric Acute Lymphoblastic Leukaemia. *Front. Pediatr.* *9*, 774853.

Goedert, M. (1987). Neuronal localization of amyloid beta protein precursor mRNA in normal human brain and in Alzheimer's disease. *EMBO J.* *6*, 3627–3632.

Hsiao, K., Chapman, P., Nilsson, S., Eckman, C., Harigaya, Y., Younkin, S., Yang, F., and Cole, G. (1996). Correlative memory deficits, Abeta elevation, and amyloid plaques in transgenic mice. *Science* *274*, 99–102.

Hsiao, K.K., Borchelt, D.R., Olson, K., Johannsdottir, R., Kitt, C., Yunis, W., Xu, S., Eckman, C., Younkin, S., Price, D., et al. (1995). Age-related CNS disorder and early death in transgenic FVB/N mice overexpressing Alzheimer amyloid precursor proteins. *Neuron* *15*, 1203–1218.



- Inyushin, M.Y., Sanabria, P., Rojas, L., Kucheryavykh, Y., and Kucheryavykh, L. (2017). Abeta Peptide Originated from Platelets Promises New Strategy in Anti-Alzheimer's Drug Development. *BioMed Res. Int.* 2017, 3948360.
- Jaunmuktane, Z., Mead, S., Ellis, M., Wadsworth, J.D.F., Nicoll, A.J., Kenny, J., Launchbury, F., Linehan, J., Richard-Loendt, A., Walker, A.S., et al. (2015a). Erratum: Evidence for human transmission of amyloid-beta pathology and cerebral amyloid angiopathy. *Nature* 526, 595.
- Jaunmuktane, Z., Mead, S., Ellis, M., Wadsworth, J.D.F., Nicoll, A.J., Kenny, J., Launchbury, F., Linehan, J., Richard-Loendt, A., Walker, A.S., et al. (2015b). Evidence for human transmission of amyloid-beta pathology and cerebral amyloid angiopathy. *Nature* 525, 247–250.
- Jefferies, W.A., Price, K.A., Biron, K.E., Fenninger, F., Pfeifer, C.G., and Dickstein, D.L. (2013). Adjusting the compass: new insights into the role of angiogenesis in Alzheimer's disease. *Alzheimer's Res. Ther.* 5, 64.
- Jin, M.C., Medress, Z.A., Azad, T.D., Doulames, V.M., and Veeravagu, A. (2019). Stem cell therapies for acute spinal cord injury in humans: a review. *Neurosurg. Focus* 46, E10.
- Karussis, D., Karageorgiou, C., Vaknin-Dembinsky, A., Gowda-Kurkalli, B., Gomori, J.M., Kassis, I., Bulte, J.W.M., Petrou, P., Ben-Hur, T., Abramsky, O., and Slavin, S. (2010). Safety and immunological effects of mesenchymal stem cell transplantation in patients with multiple sclerosis and amyotrophic lateral sclerosis. *Arch. Neurol.* 67, 1187–1194.
- Kikuchi, T., Morizane, A., Doi, D., Magotani, H., Onoe, H., Hayashi, T., Mizuma, H., Takara, S., Takahashi, R., Inoue, H., et al. (2017). Human iPS cell-derived dopaminergic neurons function in a primate Parkinson's disease model. *Nature* 548, 592–596.
- Kim, J.H., Auerbach, J.M., Rodríguez-Gómez, J.A., Velasco, I., Gavin, D., Lumelsky, N., Lee, S.H., Nguyen, J., Sánchez-Pernaute, R., Bankiewicz, K., and McKay, R. (2002). Dopamine neurons derived from embryonic stem cells function in an animal model of Parkinson's disease. *Nature* 418, 50–56.
- Kucheryavykh, L.Y., Dávila-Rodríguez, J., Rivera-Aponte, D.E., Zueva, L.V., Washington, A.V., Sanabria, P., and Inyushin, M.Y. (2017). Platelets are responsible for the accumulation of beta-amyloid in blood clots inside and around blood vessels in mouse brain after thrombosis. *Brain Res. Bull.* 128, 98–105.
- Levine, S., Saltzman, A., Levy, E., and Ginsberg, S.D. (2009). Systemic pathology in aged mouse models of Down's syndrome and Alzheimer's disease. *Exp. Mol. Pathol.* 86, 18–22.
- Li, Q.X., Evin, G., Small, D.H., Multhaup, G., Beyreuther, K., and Masters, C.L. (1995). Proteolytic processing of Alzheimer's disease beta A4 amyloid precursor protein in human platelets. *J. Biol. Chem.* 270, 14140–14147.
- Matsubara, E., Shoji, M., Murakami, T., Abe, K., Frangione, B., and Ghiso, J. (2002). Platelet microparticles as carriers of soluble Alzheimer's amyloid beta (sAbeta). *Ann. N. Y. Acad. Sci.* 977, 340–348.
- Meena, P., Bhargava, V., Rana, D., Bhalla, A., and Gupta, A. (2020). An Approach to Neurological Disorders in a Kidney Transplant Recipient. *Kidney360* 1, 837–844.
- Meyer-Luehmann, M., Coomaraswamy, J., Bolmont, T., Kaeser, S., Schaefer, C., Kilger, E., Neuenschwander, A., Abramowski, D., Frey, P., Jaton, A.L., et al. (2006). Exogenous induction of cerebral beta-amyloidogenesis is governed by agent and host. *Science* 313, 1781–1784.
- Mita, S., Schon, E.A., and Herbert, J. (1989). Widespread expression of amyloid beta-protein precursor gene in rat brain. *Am. J. Pathol.* 134, 1253–1261.
- Montagne, A., Barnes, S.R., Sweeney, M.D., Halliday, M.R., Sagare, A.P., Zhao, Z., Toga, A.W., Jacobs, R.E., Liu, C.Y., Amezcuca, L., et al. (2015). Blood-brain barrier breakdown in the aging human hippocampus. *Neuron* 85, 296–302.
- International Mouse Phenotyping Consortium. Y-Maze Protocol - IMPReSS. <https://www.mousephenotype.org/impress/ProcedureInfo?action=list&procID=955>.
- Murphy, M.P., and LeVine, H., 3rd. (2010). Alzheimer's disease and the amyloid-beta peptide. *J. Alzheimers Dis.* 19, 311–323.
- National Stem Cell Foundation of Australia, and StemCell\_s\_Australia (2015). The Australian Stem Cell Handbook: What You Should Know about Stem Cell Therapies: Now and in the Future (National Stem Cell Foundation of Australia).
- Omilusik, K., Priatel, J.J., Chen, X., Wang, Y.T., Xu, H., Choi, K.B., Gopaul, R., McIntyre-Smith, A., Teh, H.S., Tan, R., et al. (2011). The Ca(v)1.4 calcium channel is a critical regulator of T cell receptor signaling and naive T cell homeostasis. *Immunity* 35, 349–360.
- Ontario\_Institute\_for\_Regenerative\_Medicine (2020). For Patients: About Stem Cell Therapies.
- Penley, S.C., Gaudet, C.M., and Threlkeld, S.W. (2013). Use of an eight-arm radial water maze to assess working and reference memory following neonatal brain injury. *J. Vis. Exp.* 4, 50940.
- Potluri, K., Holt, D., and Hou, S. (2014). Chapter 84 - Neurologic complications in renal transplantation. In *Handbook of Clinical Neurology*, J. Biller and J.M. Ferro, eds. (Elsevier), pp. 1245–1255.
- Purro, S.A., Farrow, M.A., Linehan, J., Nazari, T., Thomas, D.X., Chen, Z., Mengel, D., Saito, T., Saido, T., Rudge, P., et al. (2018). Transmission of amyloid-beta protein pathology from cadaveric pituitary growth hormone. *Nature* 564, 415–419.
- Sahni, V., and Kessler, J.A. (2010). Stem cell therapies for spinal cord injury. *Nat. Rev. Neurol.* 6, 363–372.
- Singh, C., Pfeifer, C.G., and Jefferies, W.A. (2017). Pathogenic Angiogenic Mechanisms in Alzheimer's Disease: Chapter 6 (InTechOpen).
- Singh, C.S.B., Choi, K.B., Munro, L., Wang, H.Y., Pfeifer, C.G., and Jefferies, W.A. (2021). Reversing pathology in a preclinical model of Alzheimer's disease by hacking cerebrovascular neoangiogenesis with advanced cancer therapeutics. *EBioMedicine* 71, 103503.
- Starke, R., Harrison, P., Mackie, I., Wang, G., Erusalimsky, J.D., Gale, R., Massé, J.M., Cramer, E., Pizzey, A., Biggerstaff, J., and Machin, S. (2005). The expression of prion protein (PrP(C)) in the megakaryocyte lineage. *J. Thromb. Haemostasis* 3, 1266–1273.
- Stöhr, J., Watts, J.C., Mensinger, Z.L., Oehler, A., Grillo, S.K., DeArmond, S.J., Prusiner, S.B., and Giles, K. (2012). Purified and synthetic Alzheimer's amyloid beta (Aβ) prions. *Proc. Natl. Acad. Sci. USA* 109, 11025–11030.





- U.S. Food & Drug Administration (2020). Approved Cellular and Gene Therapy Products.
- Ujiie, M., Dickstein, D.L., Carlow, D.A., and Jefferies, W.A. (2003). Blood-brain barrier permeability precedes senile plaque formation in an Alzheimer disease model. *Microcirculation* *10*, 463–470.
- van den Bogaart, L., Lang, B.M., Rossi, S., Neofytos, D., Walti, L.N., Khanna, N., Mueller, N.J., Boggian, K., Garzoni, C., Mombelli, M., et al. (2022). Central nervous system infections in solid organ transplant recipients: Results from the Swiss Transplant Cohort Study. *J. Infect.* *85*, 1–7.
- Wright, A.J., and Fishman, J.A. (2014). Central Nervous System Syndromes in Solid Organ Transplant Recipients. *Clin. Infect. Dis.* *59*, 1001–1011.
- Xu, L., Nirwane, A., and Yao, Y. (2019). Basement membrane and blood-brain barrier. *Stroke Vasc. Neurol.* *4*, 78–82.
- Yan, S.D., Chen, X., Fu, J., Chen, M., Zhu, H., Roher, A., Slattery, T., Zhao, L., Nagashima, M., Morser, J., et al. (1996). RAGE and amyloid-beta peptide neurotoxicity in Alzheimer's disease. *Nature* *382*, 685–691.
- Zheng, H., Jiang, M., Trumbauer, M.E., Sirinathsinghji, D.J., Hopkins, R., Smith, D.W., Heavens, R.P., Dawson, G.R., Boyce, S., Conner, M.W., et al. (1995). beta-Amyloid precursor protein-deficient mice show reactive gliosis and decreased locomotor activity. *Cell* *81*, 525–531.
- Zlokovic, B.V., Ghiso, J., Mackic, J.B., McComb, J.G., Weiss, M.H., and Frangione, B. (1993). Blood-brain barrier transport of circulating Alzheimer's amyloid beta. *Biochem. Biophys. Res. Commun.* *197*, 1034–1040.
- Zlokovic, B.V., Martel, C.L., Mackic, J.B., Matsubara, E., Wisniewski, T., McComb, J.G., Frangione, B., and Ghiso, J. (1994). Brain uptake of circulating apolipoproteins J and E complexed to Alzheimer's amyloid beta. *Biochem. Biophys. Res. Commun.* *205*, 1431–1437.
- Zuroff, L., Daley, D., Black, K.L., and Koronyo-Hamaoui, M. (2017). Clearance of cerebral Abeta in Alzheimer's disease: reassessing the role of microglia and monocytes. *Cell. Mol. Life Sci.* *74*, 2167–2201.

**Stem Cell Reports, Volume 19**

**Supplemental Information**

**Conclusive demonstration of iatrogenic Alzheimer's disease transmission in a model of stem cell transplantation**

**Chaahat S.B. Singh, Kelly Marie Johns, Suresh Kari, Lonna Munro, Angela Mathews, Franz Fenninger, Cheryl G. Pfeifer, and Wilfred A. Jefferies**

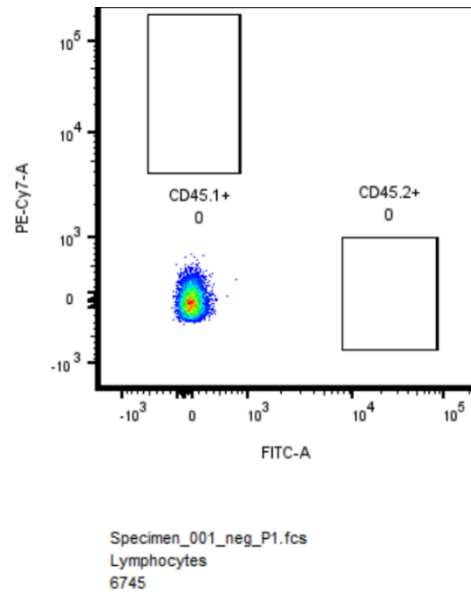

**Supplemental Figure 1: Negative control for FACS analysis of successful reconstitution of donor bone marrow cell population in recipient.**

a.

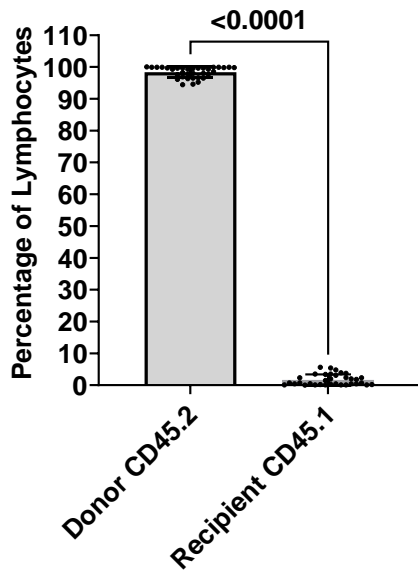

Source of CD45 type lymphocytes

b.

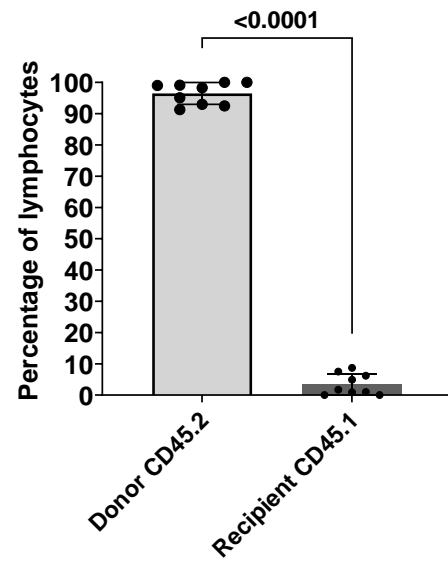

Source of CD45 type lymphocytes

**Supplemental Figure 2: Summary statistics for percentage of CD45.1+ and CD45.2+ cells for all recipient animals at 2m post-transplantation**

- a. Percentage of lymphocytes from donors and recipients. The percentage of donor lymphocytes is higher than the threshold set for a successful transplant (90%) *indicating a successful reconstitution of AD or WT donor bone marrow cells in irradiated APP KO recipients.*
- b. Percentage of lymphocytes from donors and recipients. The percentage of donor lymphocytes is higher than the threshold set for a successful transplant (90%) *indicating a successful reconstitution of AD donor bone marrow cells in irradiated WT recipients.*

Data represented as the mean  $\pm$  standard deviation. Statistical significance was calculated using unpaired t-test,  $p \leq 0.05$ .



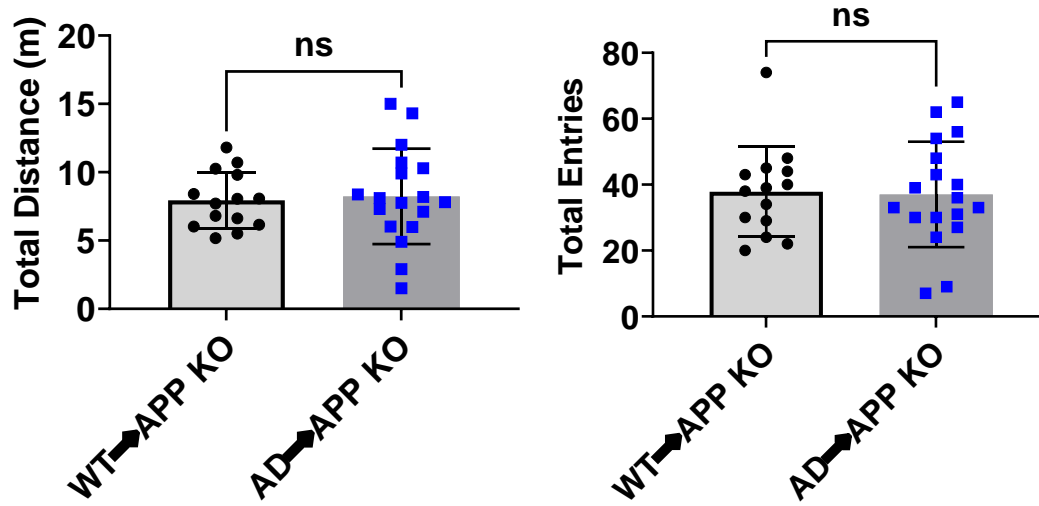

**Supplemental figure 3: Total distance travelled and total number of entries made by mice in the Y-maze**

No significant difference is seen in total distance travelled in the Y-maze and entries made between AD→APP KO mice and WT→APP KO mice. Data represented as the mean± standard deviation. Statistical significance was calculated using unpaired t-test,  $p \leq 0.05$ .

Merged Channels CD105+DAPI+A $\beta$ +CD31: AD $\rightarrow$ APP KO (a) - CD105+DAPI: AD $\rightarrow$ APP KO (a) - A $\beta$ : AD $\rightarrow$ APP KO (a)

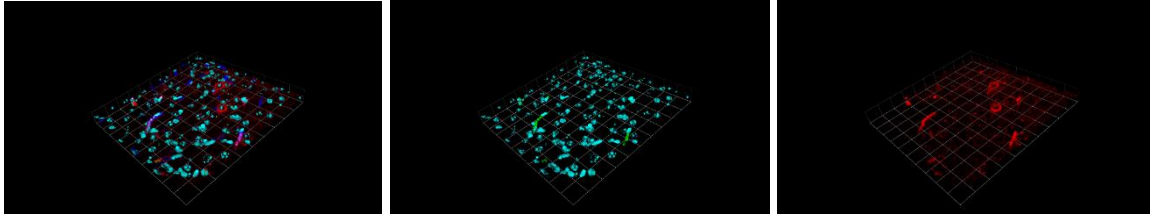

Merged Channels CD105+DAPI+A $\beta$ +CD31: AD $\rightarrow$ APP KO (b) - CD105+DAPI: AD $\rightarrow$ APP KO (b) - A $\beta$ : AD $\rightarrow$ APP KO (b)

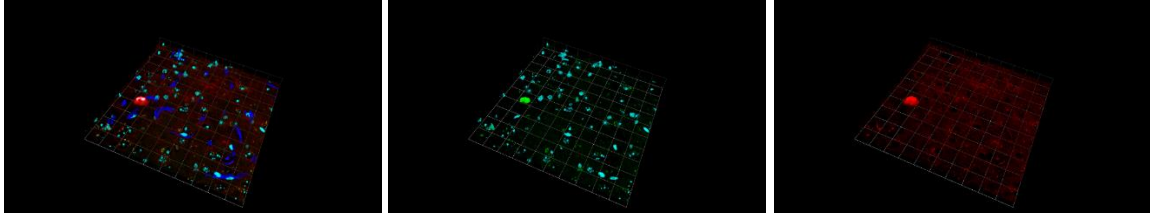

Merged Channels CD105+DAPI+A $\beta$ +CD31: AD $\rightarrow$ APP KO (c) - CD105+DAPI: AD $\rightarrow$ APP KO (c) - A $\beta$ : AD $\rightarrow$ APP KO (c)

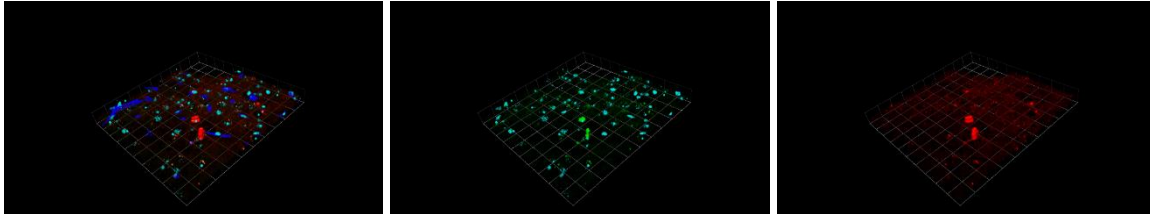

Merged Channels CD105+DAPI+A $\beta$ +CD31: WT $\rightarrow$ APP KO (a) - CD105+DAPI: WT $\rightarrow$ APP KO (a) - A $\beta$ : WT $\rightarrow$ APP KO (a)

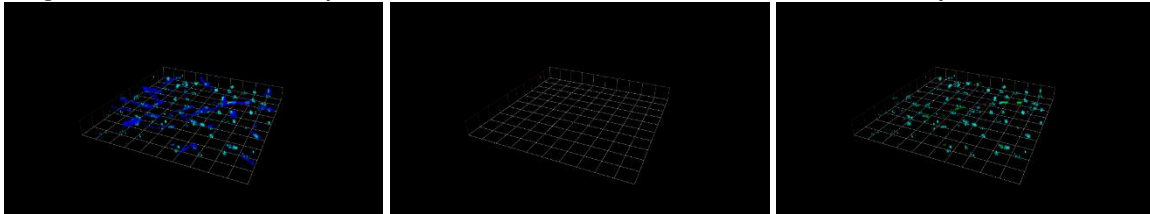

Merged Channels CD105+DAPI+A $\beta$ +CD31: WT $\rightarrow$ APP KO (b) - CD105+DAPI: WT $\rightarrow$ APP KO (b) - A $\beta$ : WT $\rightarrow$ APP KO (b)

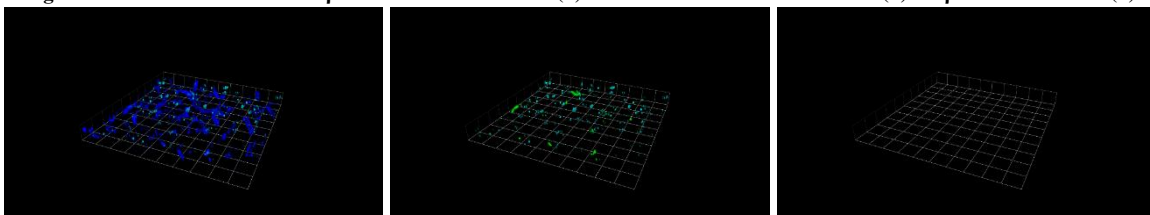

Merged Channels CD105+DAPI+A $\beta$ +CD31: WT $\rightarrow$ APP KO (c) - CD105+DAPI: WT $\rightarrow$ APP KO (c) - A $\beta$ : WT $\rightarrow$ APP KO (c)

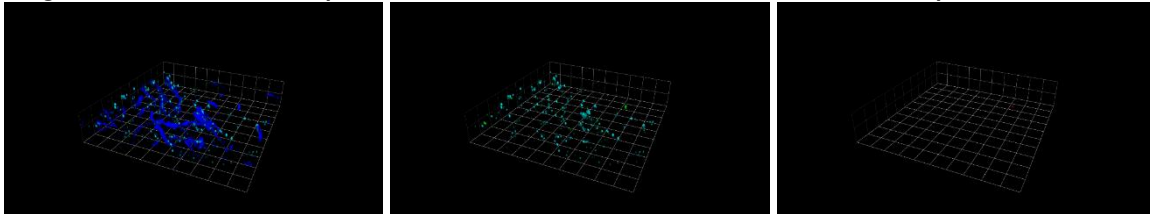

**Supplemental figure 4: IHC images showing presence of proteins implicated in AD pathology in the cortical region of mouse brains; A $\beta$  in Tg2576.BM $\rightarrow$ APP.KO and absence of it in B6/SJL.BM $\rightarrow$ APP.KO brains. Scale is 100  $\mu$ m**

a.

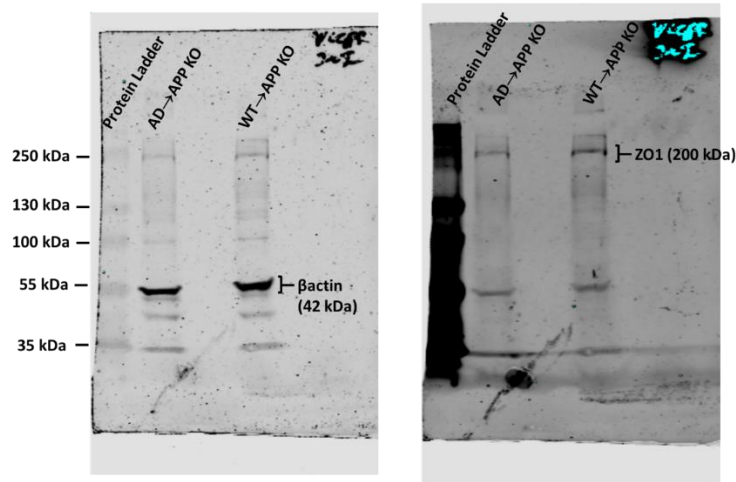

b.

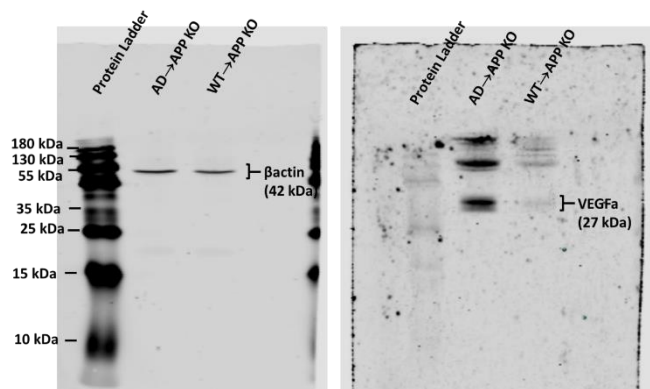

c.

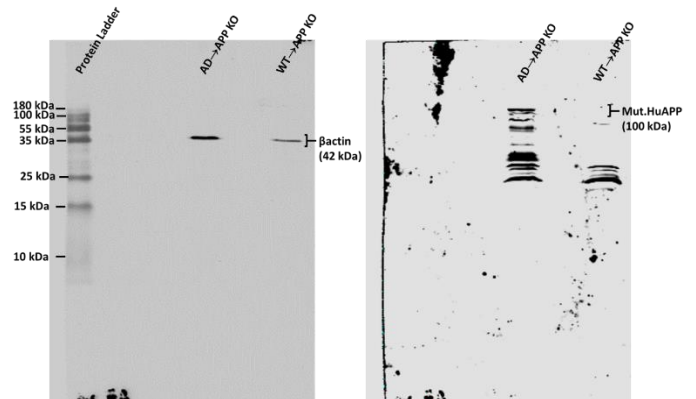

**Supplemental Figure 5: Full representative blots for presence of or reduction of proteins of interest implicated in AD pathology in AD->APP KO mice.**

- Blot shows the lower ZO 1 expression in AD->APP KO mice compared to WT->APP KO mice.
- Blot shows the higher VEGFa (pro-angiogenic protein) in AD->APP KO mice compared to WT->APP KO mice.
- Blot indicates the presence of the mutant human APP protein in AD->APP KO mice and the absence of it in WT->APP KO mice.

## **Star Procedures**

### **Mice**

The Tg2576 AD model mouse expresses the K670N/M671L Swedish mutation of the amyloid precursor protein (Hsiao et al., 1996; Hsiao et al., 1995) under control of the hamster prion protein promoter. The promoter is active predominantly in the nervous system and other tissues (Asante et al., 2002), but is also expressed in the haemopoietic lineage that give rise to platelets (Starke et al., 2005). Mice were maintained on hybrid C57Bl/B-SJL (B6/SJL) background by mating heterozygous Tg2576 males to B6/SJL F1 females. Genotyping was performed for all mice by PCR as described by Hsiao *et al.* (Hsiao et al., 1995). Briefly, two parallel PCR reactions were performed to distinguish heterozygote from wildtype. The PrP-APP fusion DNA (corresponding to the heterozygote) was amplified using primers 1502 (hamster PrP promoter, 5'-GTGGATAACCCCTCCCCAGCCTAGACCA-3') and 1503 (human APP, 5'-CTGACCACTCGACCAGTTCTGGGT-3'). The primer combination 1502 and 1501 (mouse PrP, 5'-AAGCGGCCAAAGCCTGGAGGGTGAACA-3') was used as a positive control for the reaction. Tg2576 mice are always heterozygous for the transgene as the homozygous offspring is not viable.

### **Behavioral Testing**

#### **Open Field Test**

The Open Field Test used a plexiglass chamber measuring 50 cm (length) x 50 cm (width) x 38 cm (height) with dark coloured walls and a light source focused in the center. All animals were tested separately. The floor of the chamber was demarcated into central and peripheral regions and this field was calibrated in the computer software, so the camera could create physical distance data from pixel-based information. The system was connected to a black and white analog tracking camera with an RTV24 Digitizer that was placed overhead of the open field. The path travelled and the time spent in either region of the field was tracked and recorded for a total of 5 minutes using the computer tracking system (ANY-maze, Stoelting). The Open Field Test exploits the innate behaviour of 'thigmotaxis' where the mice tend to stay towards the shaded edges of an open field and keep away from the brighter center. This implies



that mice that have intact cognition and awareness of the potential danger in the environment will spend less time in the center of the field. This test assesses an animal's anxiety, locomotion and exploration of a novel environment.

### **Spontaneous alternation (Y-maze):**

The test for novelty exploration using spatial and working memory was conducted using a symmetrical Y-maze with a grey steel bottom plate and grey Perspex® walls (Stoelting Co, Wood Dale, IL). Each arm of the Y-maze was 35 cm long, 5 cm wide, and 10 cm high, and the wall at the end of each arm was identified by a different colour: white, blue or red. The spatial acquisition phase comprised a one-day trial with the mice tracked while moving freely through the three arms of the Y maze during an 8-minute session. The movements were tracked by a computer tracking system (ANY-maze, Stoelting)(Miedel et al., 2017). The performance was gauged by the percentage of alternations that was calculated as the total number of alternations  $\times 100 / (\text{total number of arm entries} - 2)$ . Alternation was defined as successive entries into the three arms on overlapping triplet sets. A high percentage of alternation was indicative of sustained cognition, as the animals must remember which arm was entered last to avoid re-entering it(Miedel et al., 2017).The minimum number of arm entries needed for a mouse to be included in the analysis was 5 entries (Consortium).

### **Contextual Fear Conditioning:**

The Contextual Fear Conditioning apparatus consisted of a transparent chamber inside an enclosure with an opening in the ceiling to allow video recordings(Curzon P, 2009).The chamber had a steel grid floor connected to a shock generator scrambler. The test encompassed two sessions: conditioning and a context test. On the conditioning day, the mice were individually placed in the chamber and allowed to explore freely for 5 minutes during which, at the 180th second, they received a foot shock of 0.50–0.80 mA for 3 seconds through the bars of the floor. The amplitude of the shocks delivered was determined based on

previous studies performed (Singh et al., 2021). 24 hours after conditioning, the mice were individually placed back in the chamber for 4 minutes, this time with no noxious stimuli. The mice were monitored for movement and freezing behaviour was recorded using computer software (Limelight, ActiMetrics, Wilmette, IL, USA). Exclusion criteria were set for freezing events less than 2 seconds. This test was used to determine associative working memory. We explored the animal's ability to associate an environment with a noxious event that it experienced there. When the animal is returned to the same environment, it generally will demonstrate a freezing response if it remembers and associates that environment with the shock. Freezing is a species-specific response to fear, which is defined as "the absence of movement except for respiration" (Curzon P, 2009). This may last for seconds to minutes depending on the strength of the aversive stimulus and whether the subject is able to recall the shock.

#### **Radial arm water maze (RAWM):**

The RAWM consists of eight swim paths (arms) extending out of an open central area, with an escape platform located at the end of any of four alternate arms called the 'goal arms' (Penley et al., 2013). The starting position and the goal arms were fixed throughout the duration of the study. The mice were individually placed facing the wall of an arm that was selected and maintained throughout the study as the 'start position' of the maze. The observer remained stationary at this position once the subject was placed in the maze. This was the visual cue for the mice to orient themselves in the maze. Each subject was given 60 seconds to locate one of the 4 escape platforms. With each trial, the platform that was used to escape was removed and not placed back into the maze until the end of that test day. The test was repeated until only one platform was left. Once the animal found the last platform it marked the end of the test for that day. In between each trial, the animal was removed and placed back in its heated home cage for 90 seconds to avoid hypothermia. These trials were conducted daily for a total of 5 days. The latency to reach the platform for each trial and the arm entries were recorded manually. Performance of memory and learning was gauged each day based on the average time taken to find the escape platforms and the total

number of errors, i.e. Reference memory errors + Working memory errors. A Reference memory error is defined as the entry into an arm which never had an escape platform and Working memory error is defined as the subsequent entry into an arm where the platform had been removed in the previous trial (Penley et al., 2013).

### **Immunofluorescence and Confocal imaging**

The PFA fixed hemispheres were embedded in a 4% agarose block and 50 $\mu$ m thick sections were cut using a Leica VT1000S Vibratome (Leica Biosystems Inc., Germany), and then further processed for immunofluorescent microscopy. . Antigen retrieval was done by placing brain sections in a sodium citrate solution (10mM pH8) that was prewarmed at 80°C in a water bath for 30 minutes. The sections were allowed to come to room temperature and then washed thrice with PBS. The sections were then blocked with buffer (3% skimmed milk in PBS; 0.1% Tween-20) for 1 hour at room temperature followed by overnight incubation at 4°C with primary antibodies against the various proteins of interest: CD105 (R&D Systems; 15  $\mu$ g/mL, AF1097); A $\beta$ ,1-16 (1 $\mu$ g/mL, BioLegend; 803004); tight junction protein, Occludin (1:200, abcam; ab31721); and CD-31 (1:50, abcam; ab28364). For co-localization experiments, multiple antibodies were used on the sections simultaneously. The fluorophore conjugated secondary antibody incubation was done at room temperature for 1 hour at a concentration of 1:500. DAPI, at a concentration of 0.1  $\mu$ g/mL, was used for nuclear counterstaining for 5 minutes before the first wash following the secondary antibody incubation. Sections were then washed using PBS with 0.1% Tween-20 before being cover-slipped with Fluoromount-G. Slides were allowed to air-dry overnight in the dark.

The cortical region of the mouse brain was analyzed for markers of interest involved in AD

pathology. The image acquisition was done using a Olympus FV-10i confocal microscope with a high-resolution Olympus 60 X/1.4 oil-immersion objective lens (Olympus, Tokyo, Japan). For 3D image data set acquisition, the excitation beam was first focused at the maximum signal intensity focal position within the brain tissue sample and the appropriate exposure times were selected to avoid pixel saturation. A series of 2D images (Z stack) were taken at a step size of 1 $\mu$ m. The beginning and end of the 3D stack were set based on the signal level degradation. The series images taken get saved in the Olympus software. The Volocity software (PerkinElmer) was then used to process the series of images that were taken and generate a 3D reconstruction of the tissue.

- Asante, E.A., Gowland, I., Linehan, J.M., Mahal, S.P., and Collinge, J. (2002). Expression pattern of a mini human PrP gene promoter in transgenic mice. *Neurobiol Dis* 10, 1-7.
- Curzon P, R.N., Browman KE (2009). Cued and Contextual Fear Conditioning for Rodents. In *Methods of Behavior Analysis in Neuroscience*, B. JJ, ed. (CRC Press/Taylor & Francis).
- Hsiao, K., Chapman, P., Nilsen, S., Eckman, C., Harigaya, Y., Younkin, S., Yang, F., and Cole, G. (1996). Correlative memory deficits, Abeta elevation, and amyloid plaques in transgenic mice. *Science* 274, 99-102.
- Hsiao, K.K., Borchelt, D.R., Olson, K., Johannsdottir, R., Kitt, C., Yunis, W., Xu, S., Eckman, C., Younkin, S., Price, D., *et al.* (1995). Age-related CNS disorder and early death in transgenic FVB/N mice overexpressing Alzheimer amyloid precursor proteins. *Neuron* 15, 1203-1218.
- Miedel, C.J., Patton, J.M., Miedel, A.N., Miedel, E.S., and Levenson, J.M. (2017). Assessment of Spontaneous Alternation, Novel Object Recognition and Limb Claspings in Transgenic Mouse Models of Amyloid- $\beta$  and Tau Neuropathology. *Journal of visualized experiments : JoVE*, 55523.
- Penley, S.C., Gaudet, C.M., and Threlkeld, S.W. (2013). Use of an eight-arm radial water maze to assess working and reference memory following neonatal brain injury. *Journal of visualized experiments : JoVE*, 50940-50940.
- Singh, C.S.B., Choi, K.B., Munro, L., Wang, H.Y., Pfeifer, C.G., and Jefferies, W.A. (2021). Reversing pathology in a preclinical model of Alzheimer's disease by hacking cerebrovascular neoangiogenesis with advanced cancer therapeutics. *EBioMedicine* 71, 103503.
- Starke, R., Harrison, P., Mackie, I., Wang, G., Erusalimsky, J.D., Gale, R., Masse, J.M., Cramer, E., Pizzey, A., Biggerstaff, J., *et al.* (2005). The expression of prion protein (PrP(C)) in the megakaryocyte lineage. *J Thromb Haemost* 3, 1266-1273.
